# Supplementary material for: A Placebo-Controlled Trial of Prucalopride for Severe Chronic Constipation
Source: Atypon-hosted journal article supplement (doi:10.1056/nejmoa0800670), 2008-05-28
Supplement: nejm_camilleri_2344sa1.pdf [file nejm_camilleri_2344sa1.pdf]

## Supplementary Appendix

This appendix has been provided by the authors to give readers additional information about their work.

Supplement to: Camilleri M, Kerstens R, Ryck A, Vandeplassche L. A placebo-controlled trial of prucalopride for severe chronic constipation. *N Engl J Med* 2008;358:2344-54.

Patients who signed informed consent, N=832

Screen failures, N=204

|                            |                 |                 |
|----------------------------|-----------------|-----------------|
| Patients randomized, N=628 |                 |                 |
| Placebo<br>213             | PRU 2 mg<br>210 | PRU 4 mg<br>205 |

|                         |                 |                 |
|-------------------------|-----------------|-----------------|
| Study population, N=620 |                 |                 |
| Placebo<br>209          | PRU 2 mg<br>207 | PRU 4 mg<br>204 |

|                         |                   |
|-------------------------|-------------------|
| Completed<br>N=182      | Withdrawn<br>N=27 |
| Reasons for withdrawal: |                   |
| Adverse event           | n=4               |
| Insufficient response   | n=5               |
| Lost to follow-up       | n=3               |
| Withdrew consent        | n=7               |
| Non-compliance          | n=4               |
| Other                   | n=4               |

|                         |                   |
|-------------------------|-------------------|
| Completed<br>N=172      | Withdrawn<br>N=35 |
| Reasons for withdrawal: |                   |
| Adverse event           | n=18              |
| Insufficient response   | n=2               |
| Lost to follow-up       | n=3               |
| Withdrew consent        | n=3               |
| Non-compliance          | n=4               |
| Ineligible to continue  | n=3               |
| Other                   | n=2               |

|                         |                   |
|-------------------------|-------------------|
| Completed<br>N=173      | Withdrawn<br>N=31 |
| Reasons for withdrawal: |                   |
| Adverse event           | n=16              |
| Insufficient response   | n=1               |
| Lost to follow-up       | n=2               |
| Withdrew consent        | n=5               |
| Non-compliance          | n=4               |
| Other                   | n=3               |
